# Supplementary figures and images for: Nationwide multicentre comparison of preoperative biometry and predictability of cataract surgery in Japan
Source: HighWire-hosted journal article supplement (doi:10.1136/bjophthalmol-2021-318825), 2021-06-09

AXL

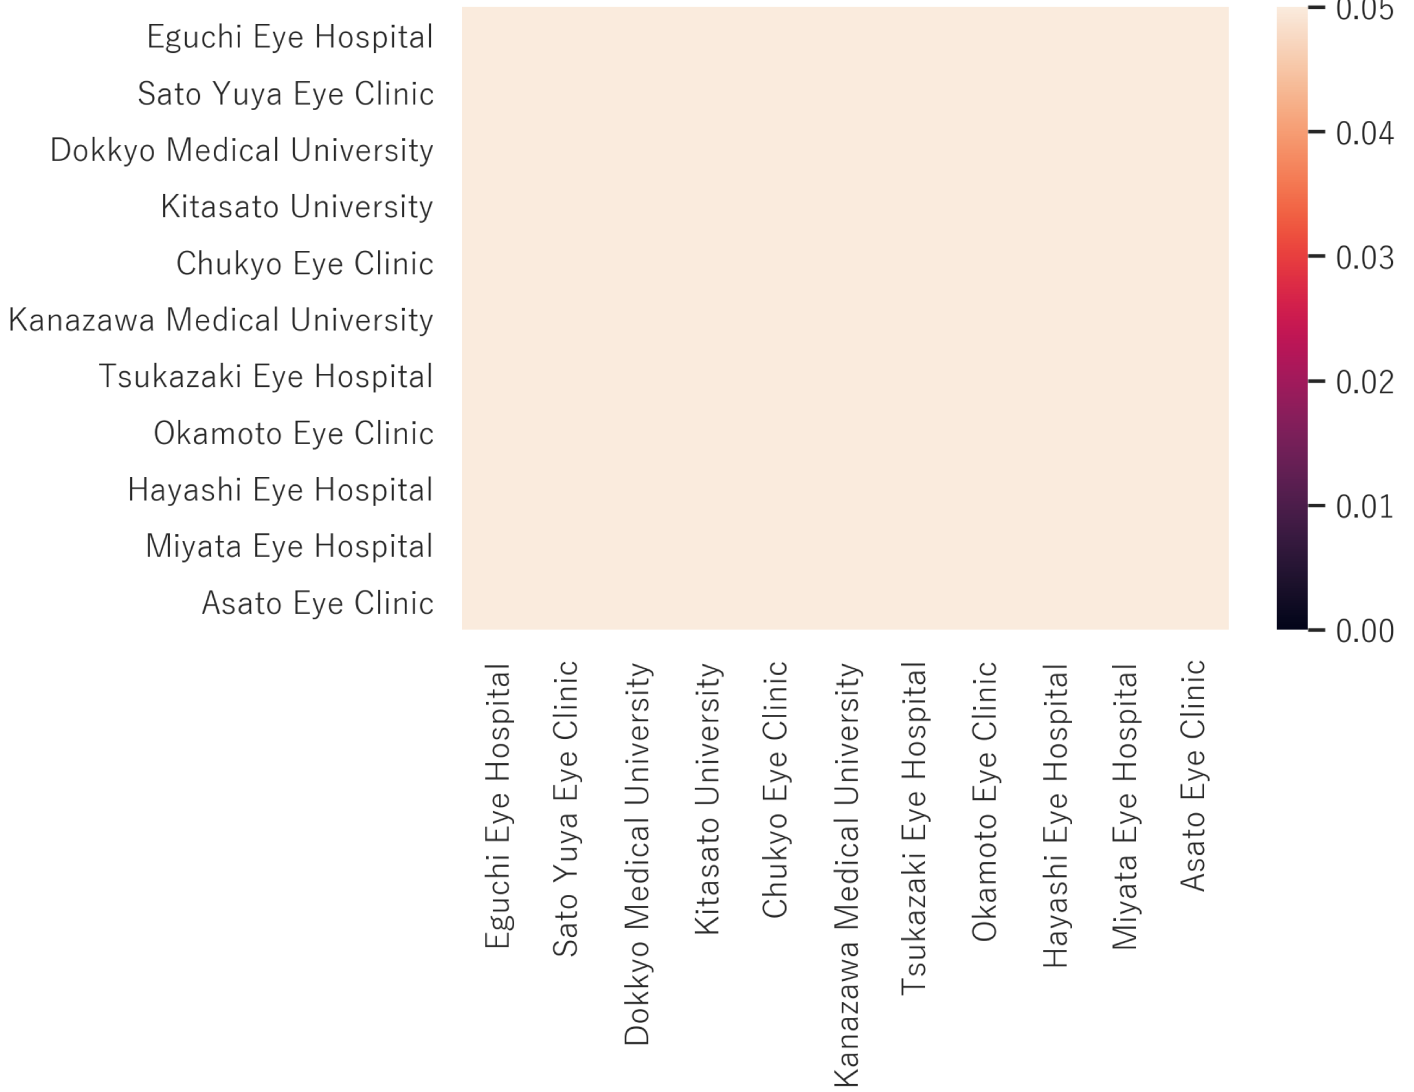

Supplement: bjophthalmol-2021-318825supp002_data_supplement.pdf [file bjophthalmol-2021-318825supp002_data_supplement.pdf]

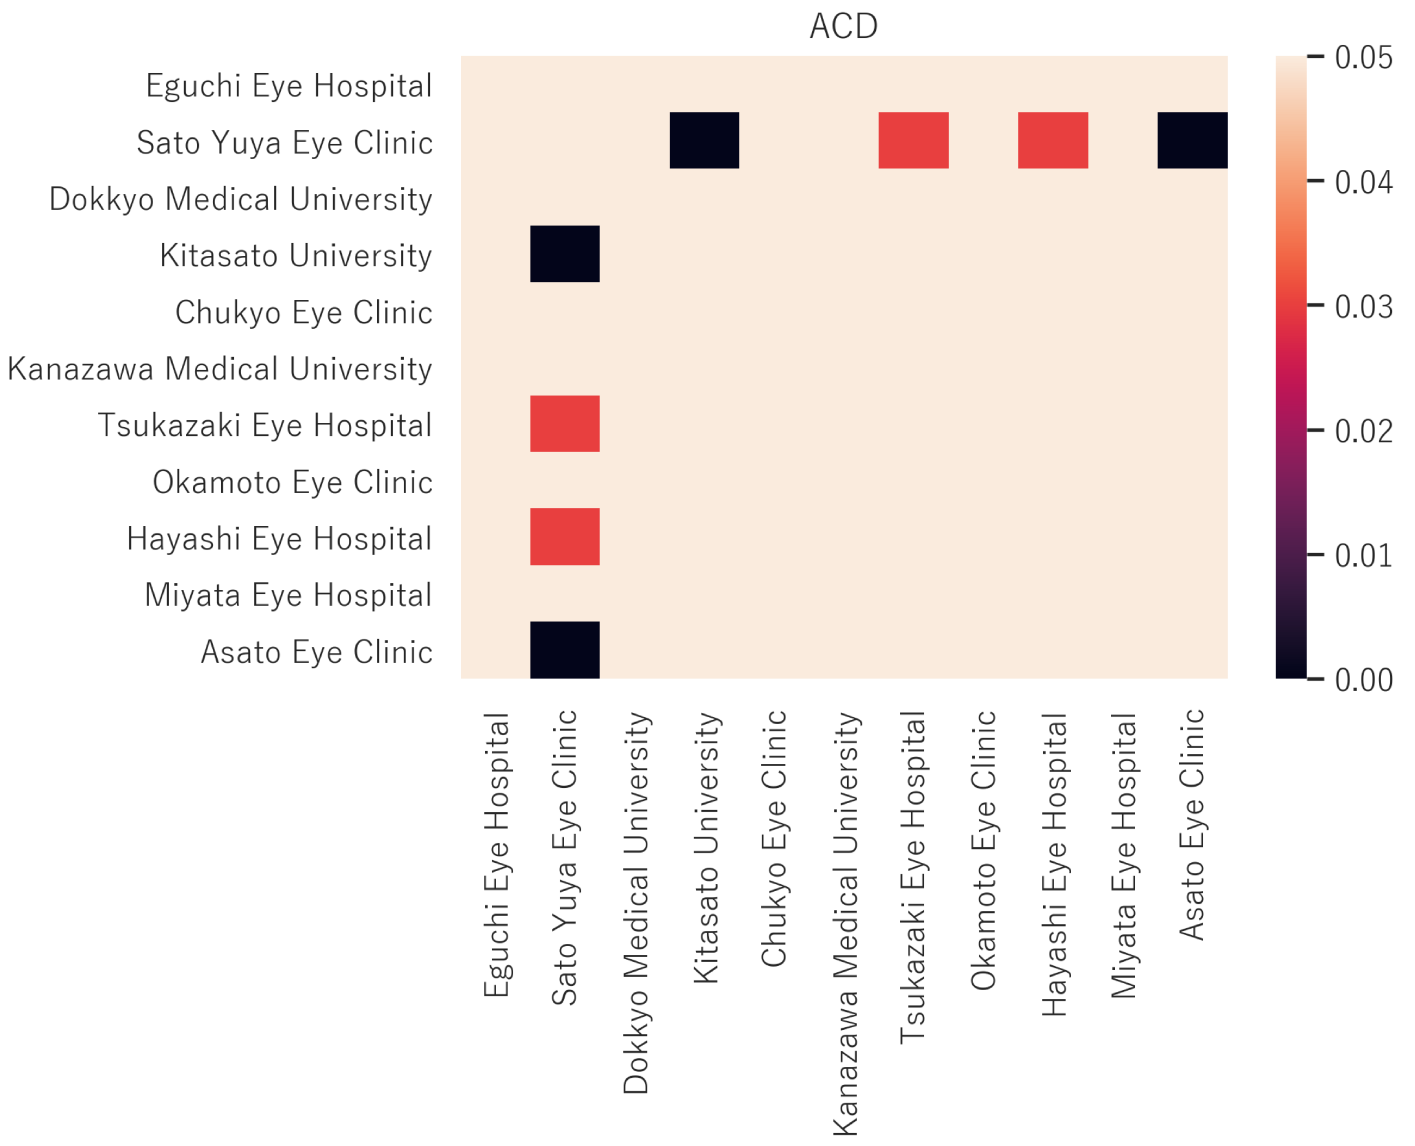

Supplement: bjophthalmol-2021-318825supp003_data_supplement.pdf [file bjophthalmol-2021-318825supp003_data_supplement.pdf]

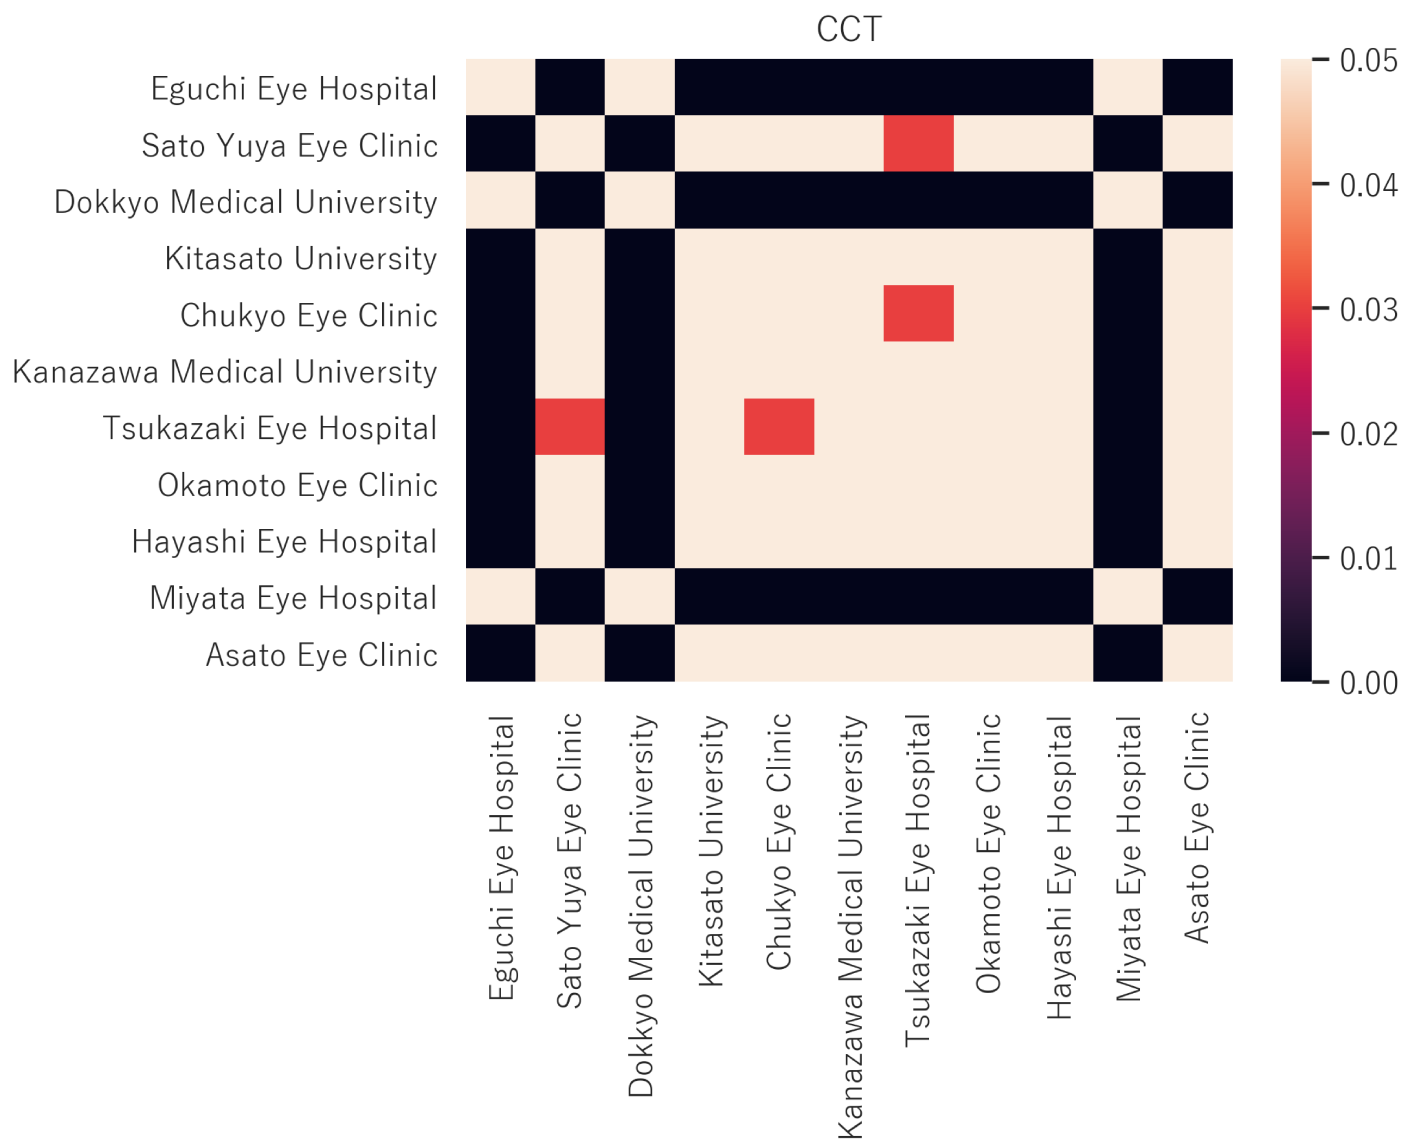

Supplement: bjophthalmol-2021-318825supp005_data_supplement.pdf [file bjophthalmol-2021-318825supp005_data_supplement.pdf]

CA

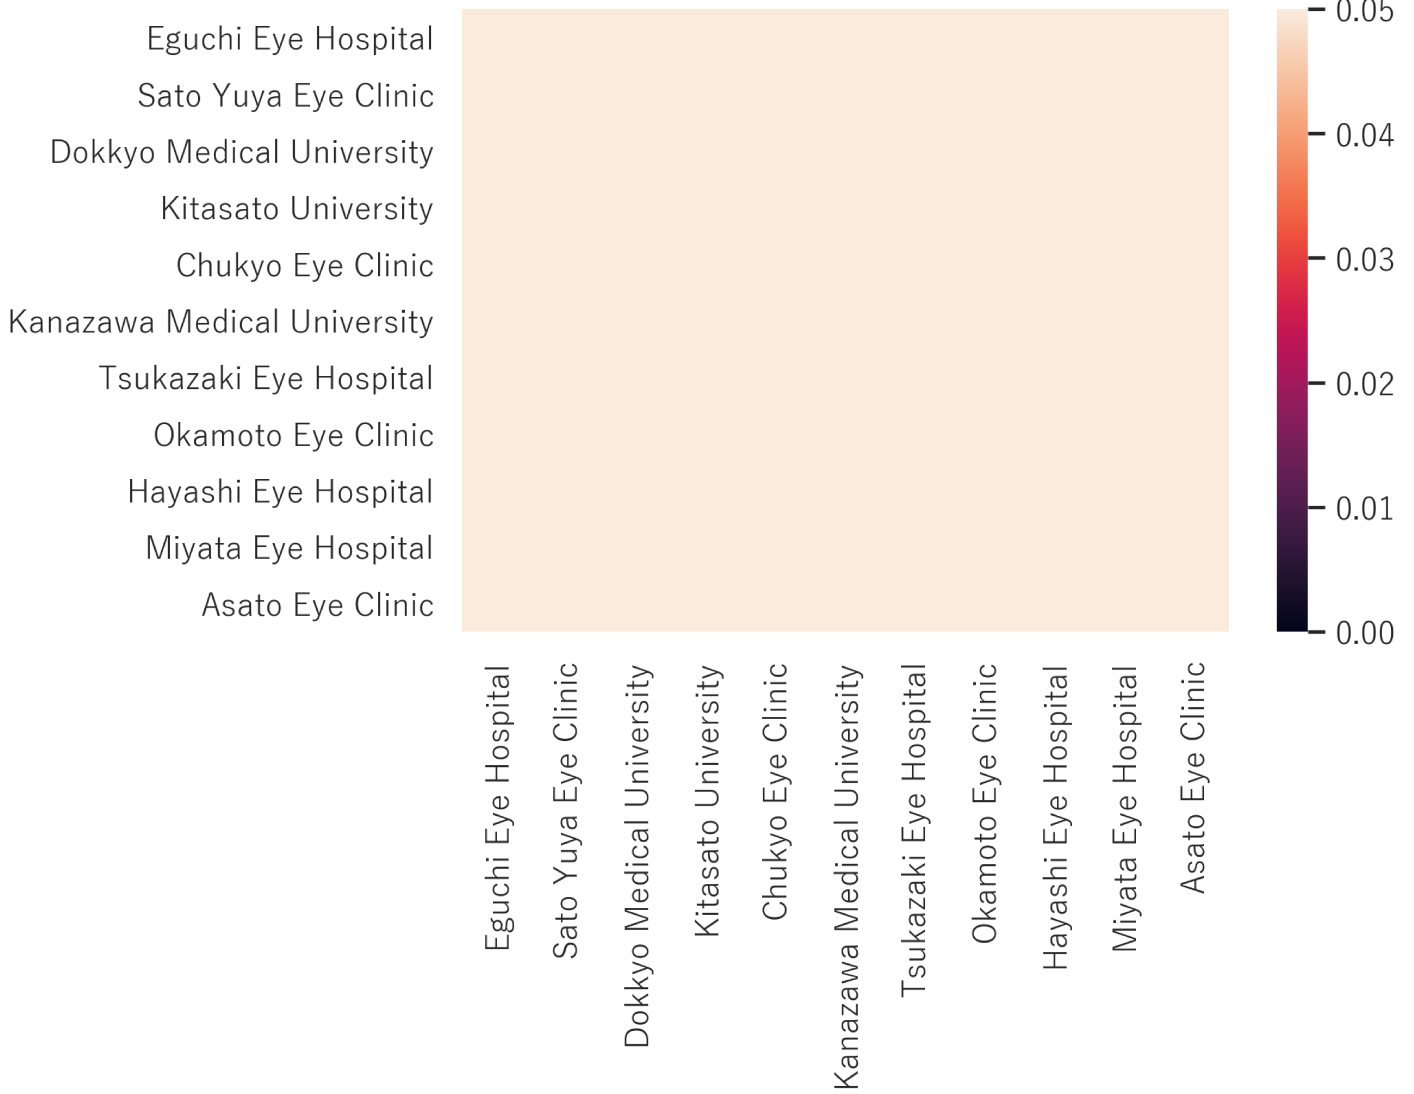

Supplement: bjophthalmol-2021-318825supp006_data_supplement.pdf [file bjophthalmol-2021-318825supp006_data_supplement.pdf]
